# Supplementary material
Source: MDPI journal article supplement (https://www.mdpi.com/1424-8247/16/9/1329)
Supplement: s1 [file s1]

# Putting a “C<sub>60</sub> ball” and Chain to Chlorin e6 Improves Its Cellular Uptake and Photodynamic Performances

Manuele Di Sante,<sup>1,†</sup> Alena Kaltenbrunner,<sup>2,†</sup> Marco Lombardo,<sup>1</sup> Alberto Danielli,<sup>2</sup> Paolo Emidio Costantini,<sup>2,\*</sup> Matteo Di Giosia,<sup>1,\*</sup> Matteo Calvaresi<sup>1,\*</sup>

<sup>1</sup> Dipartimento di Chimica “Giacomo Ciamician”, Alma Mater Studiorum—Università di Bologna, Via Francesco Selmi 2, 40126 Bologna, Italy

<sup>2</sup> Dipartimento di Farmacia e Biotecnologie, Alma Mater Studiorum—Università di Bologna, Via Francesco Selmi 3, 40126 Bologna, Italy

\* Correspondence: [paolo.costantini4@unibo.it](mailto:paolo.costantini4@unibo.it) (P.E.C.); [matteo.digiosia2@unibo.it](mailto:matteo.digiosia2@unibo.it) (M.D.G.); [matteo.calvaresi3@unibo.it](mailto:matteo.calvaresi3@unibo.it) (M.C.)

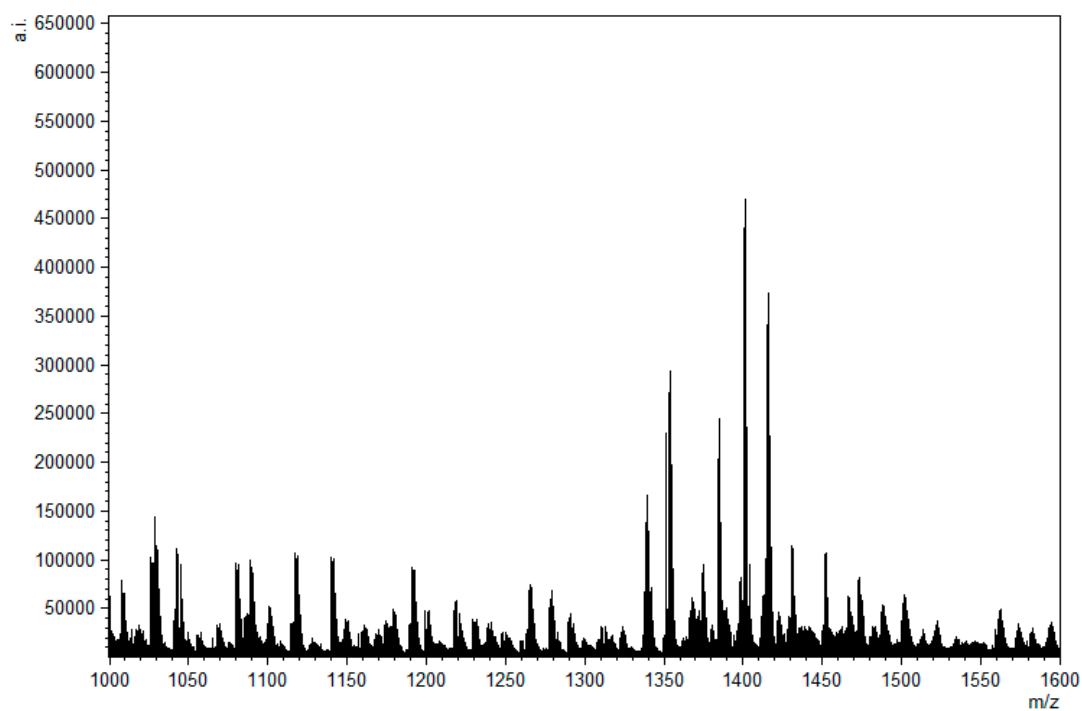

**Figure S1.** HR ESI-MS of compound Ce6-C<sub>60</sub> (MeOH, negative mode, range: 1000-1600 m/z)

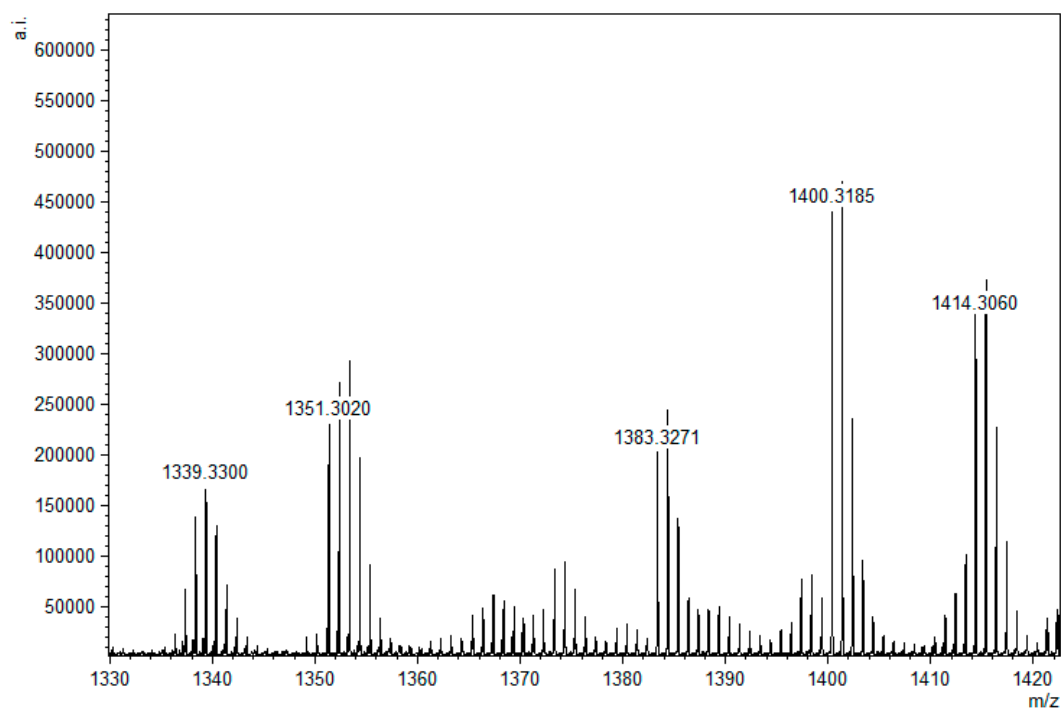

**Figure S2.** HR ESI-MS of compound Ce6-C<sub>60</sub> (MeOH, negative mode, range: 1330-1420 m/z)

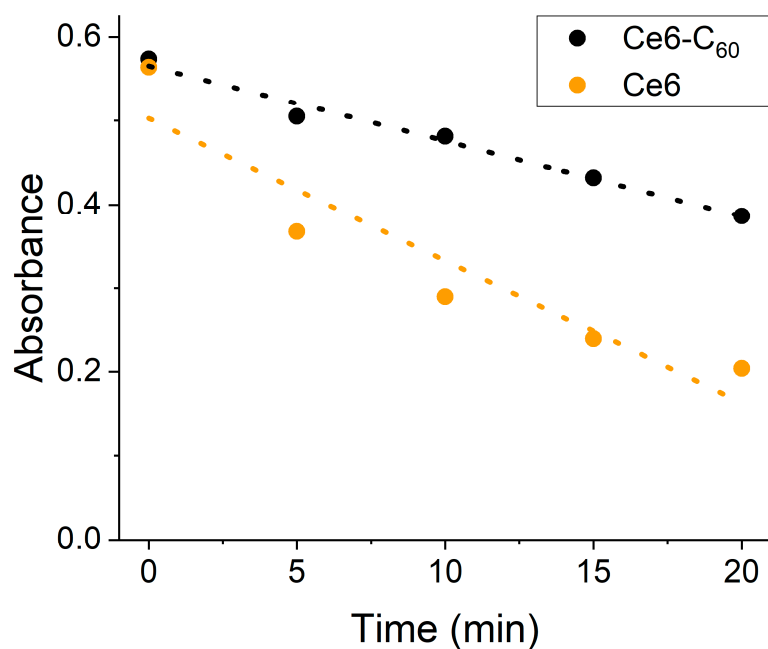

**Figure S3.** Absorbance at 401 nm of ABMDMA vs. irradiation time, under red light irradiation (irradiance  $6.32 \text{ mW/cm}^2$ ), in the presence of Ce6-C<sub>60</sub> (black dots) and Ce6 (gold dots) at  $0.5 \mu\text{M}$  concentration. Curve fitting equations (represented as dotted lines) are used to calculate the quantum yield.

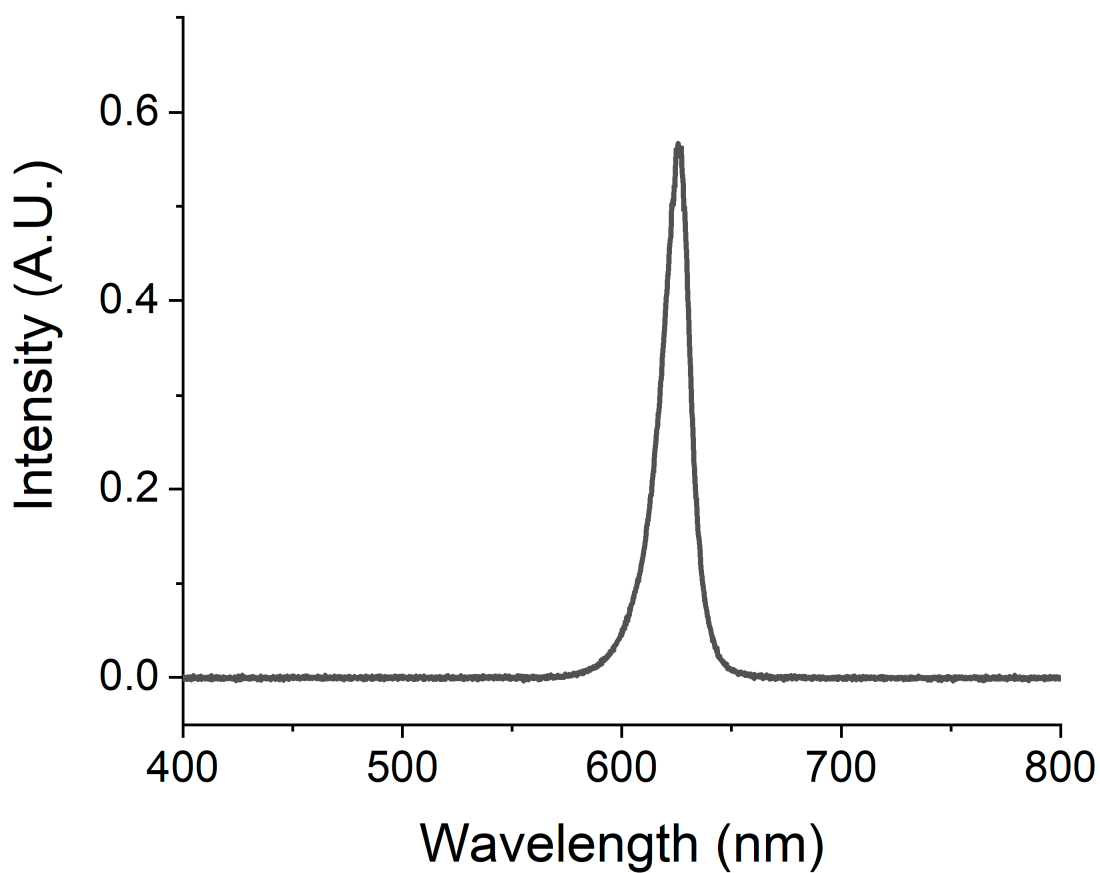

**Figure S4.** Spectral profile of the red light lamp (LED SMD 50W RGB)

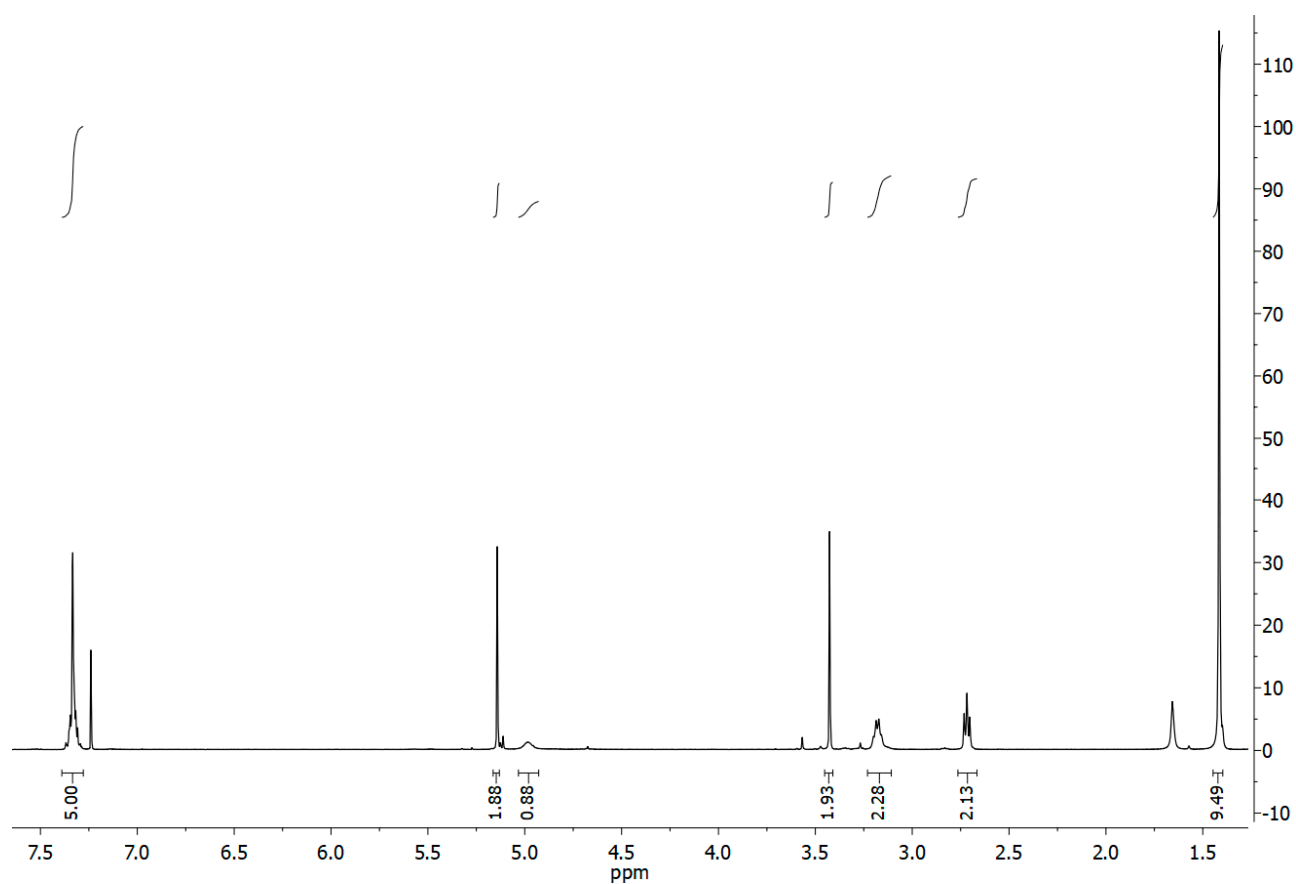

**Figure S5.**  $^1\text{H}$  NMR of compound **2** (400 MHz, Chloroform-*d*)

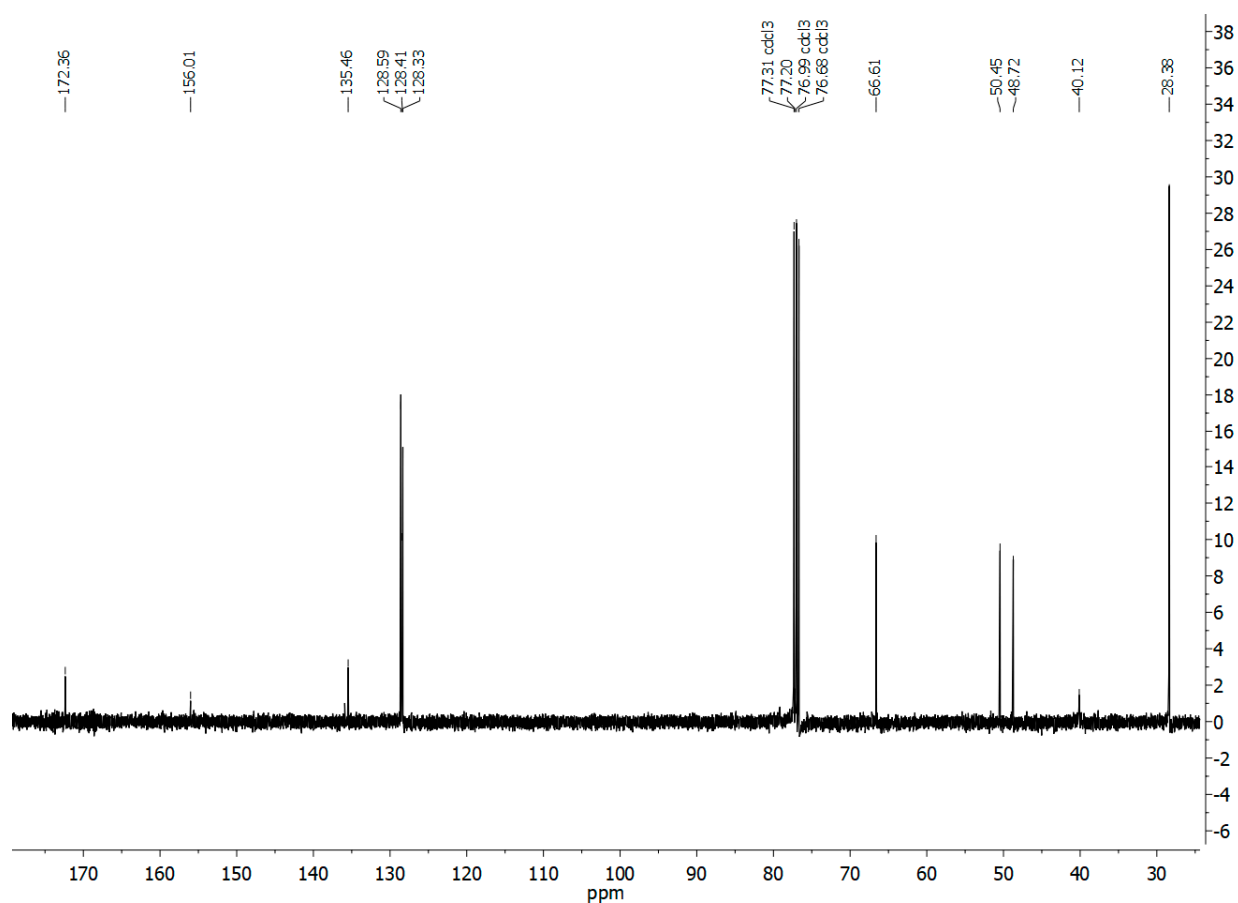

**Figure S6.**  $^{13}\text{C}$  NMR of compound **2** (100 MHz, Chloroform-*d*)

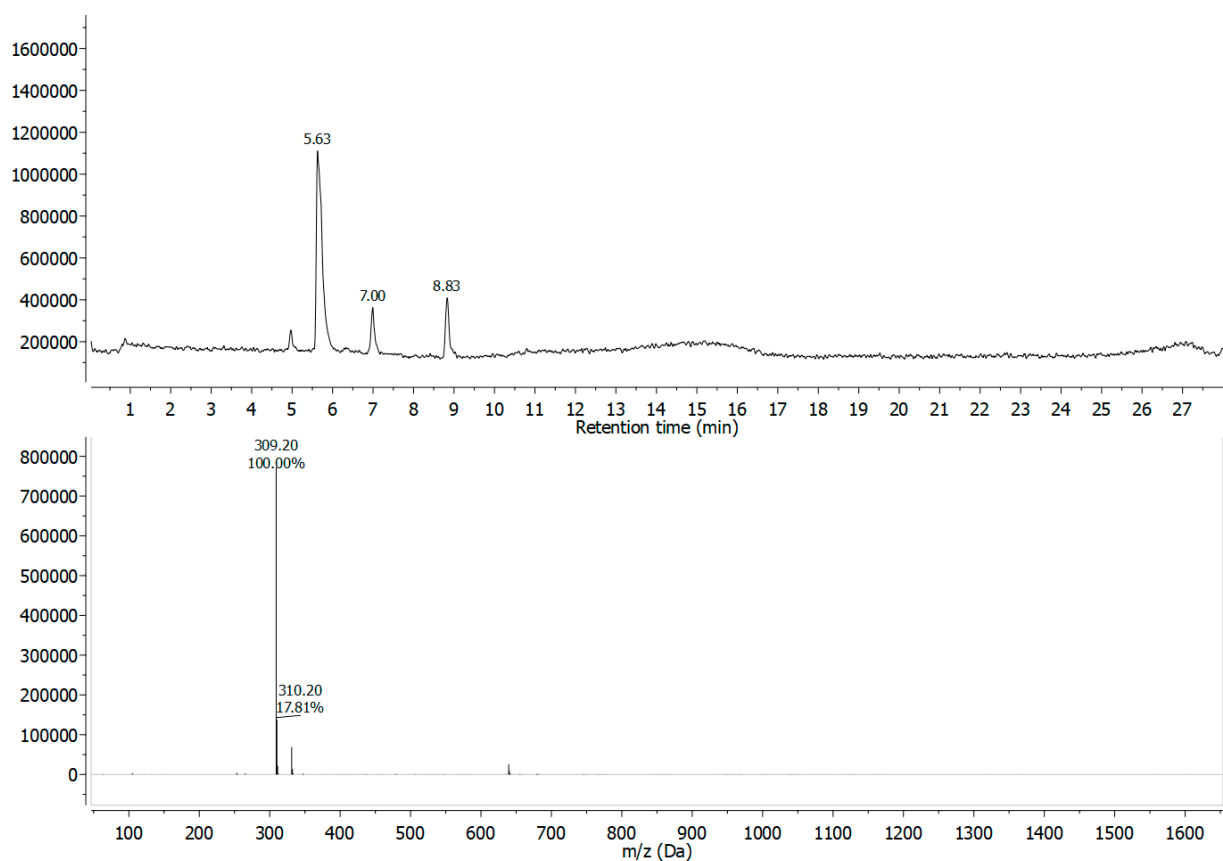

**Figure S7.** HPLC-MS of compound **2** (Acetonitrile)

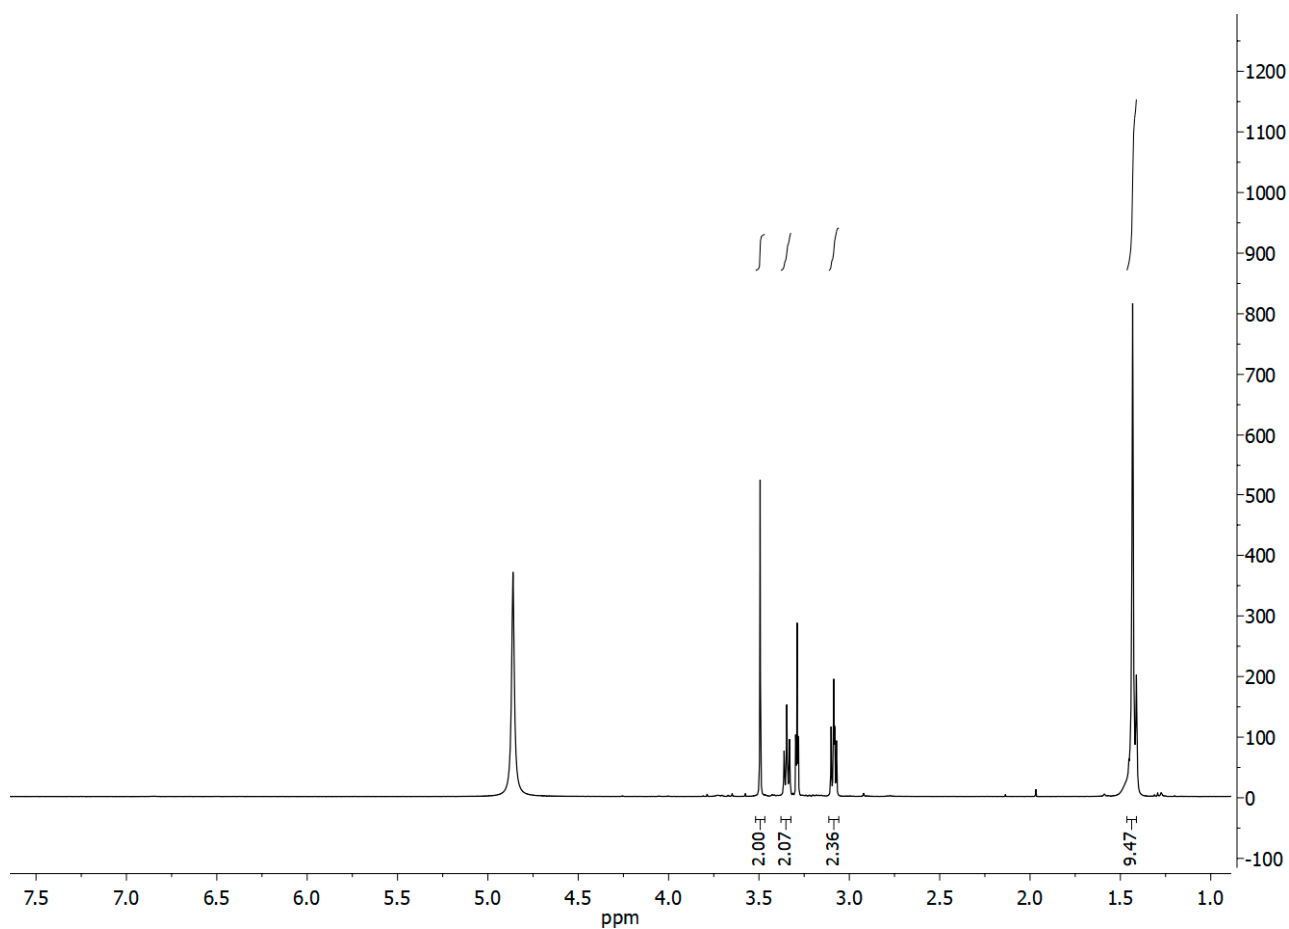

**Figure S8.** <sup>1</sup>H NMR of compound **3** (400 MHz, CD<sub>3</sub>OD)

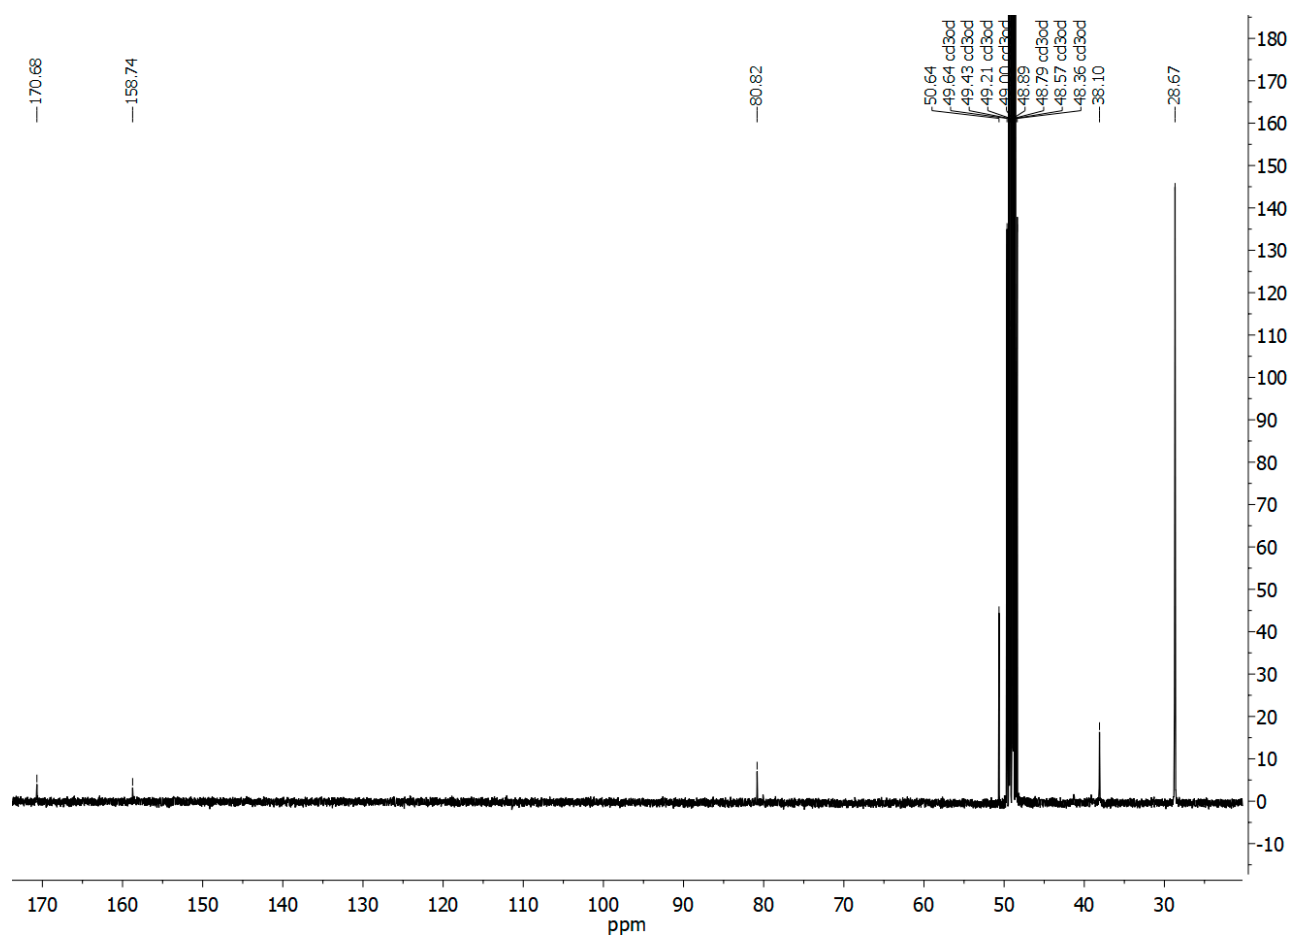

**Figure S9.** <sup>13</sup>C NMR of compound **3** (100 MHz, CD<sub>3</sub>OD)

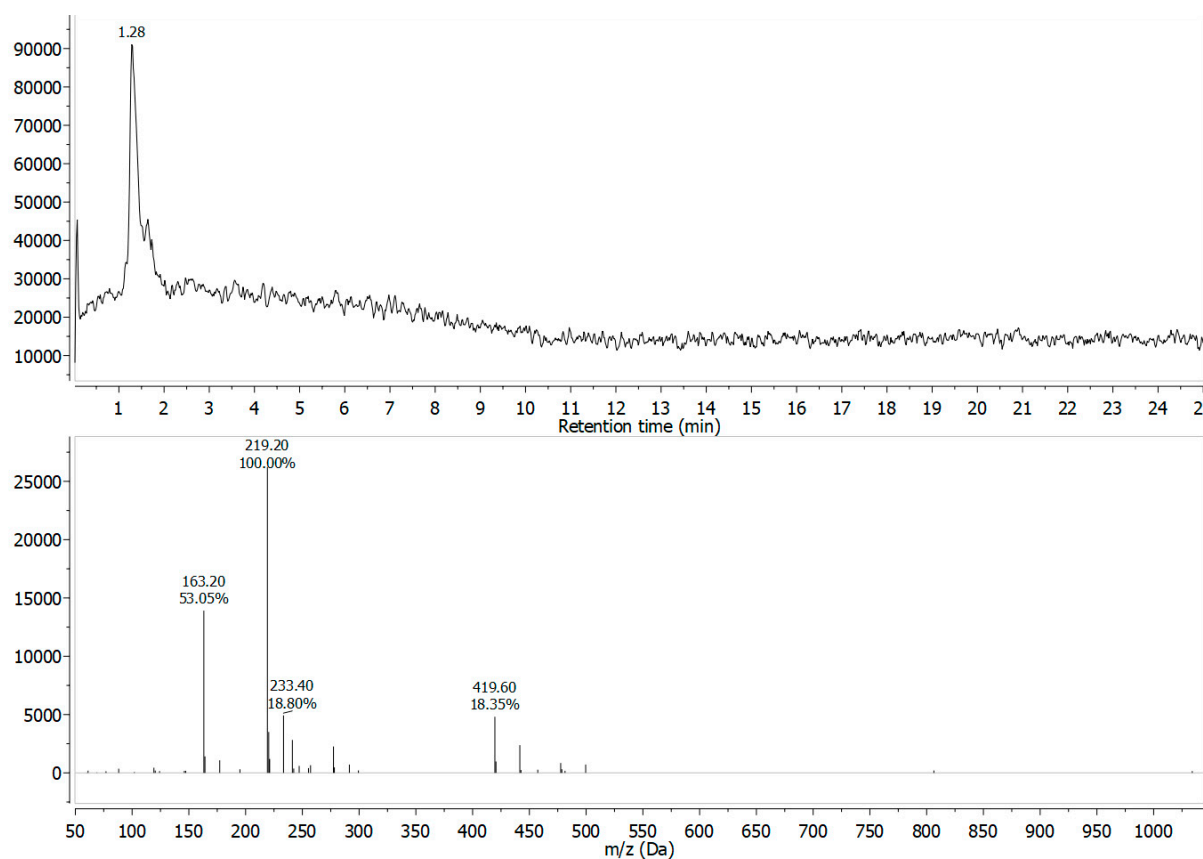

**Figure S10.** HPLC-MS of compound **3** (Acetonitrile)

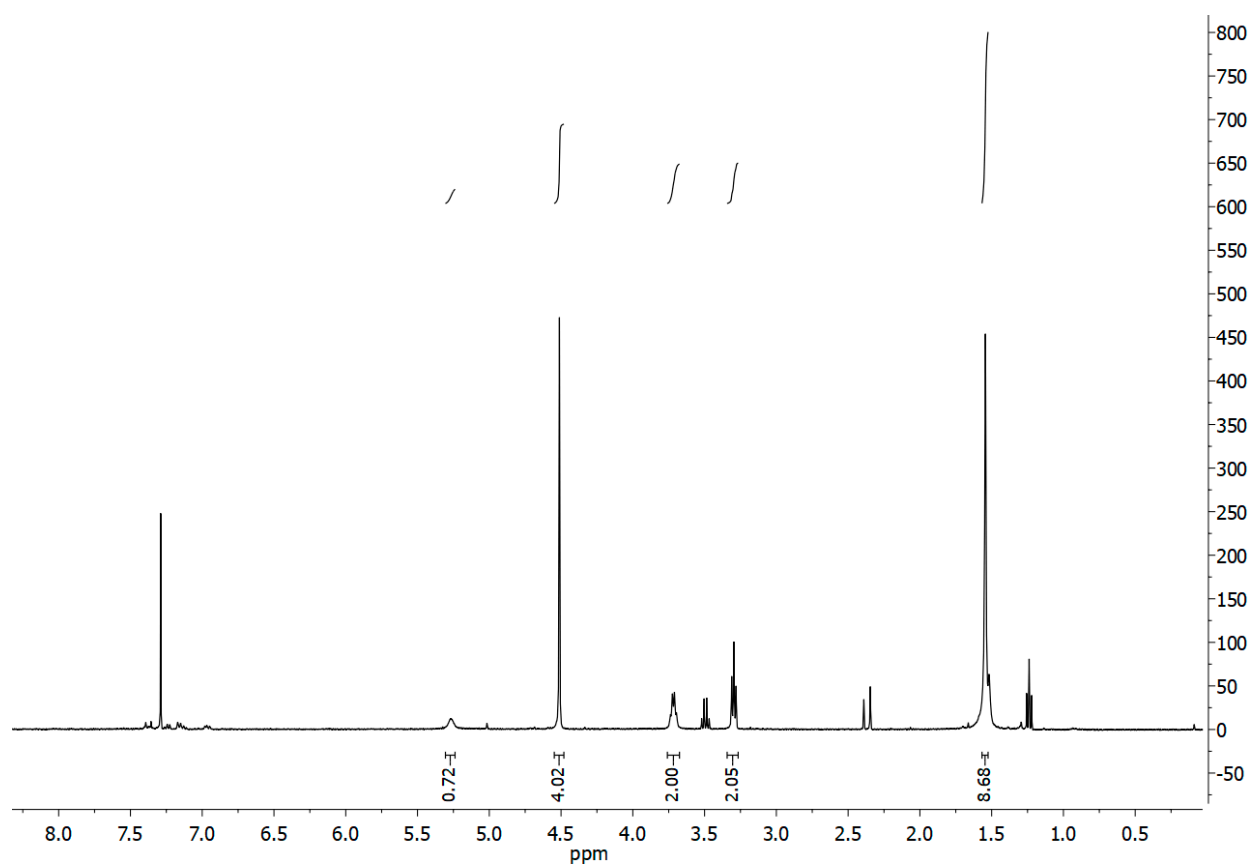

**Figure S11.** <sup>1</sup>H NMR of compound **4** (400 MHz, Chloroform-d:CS<sub>2</sub> 1:1)

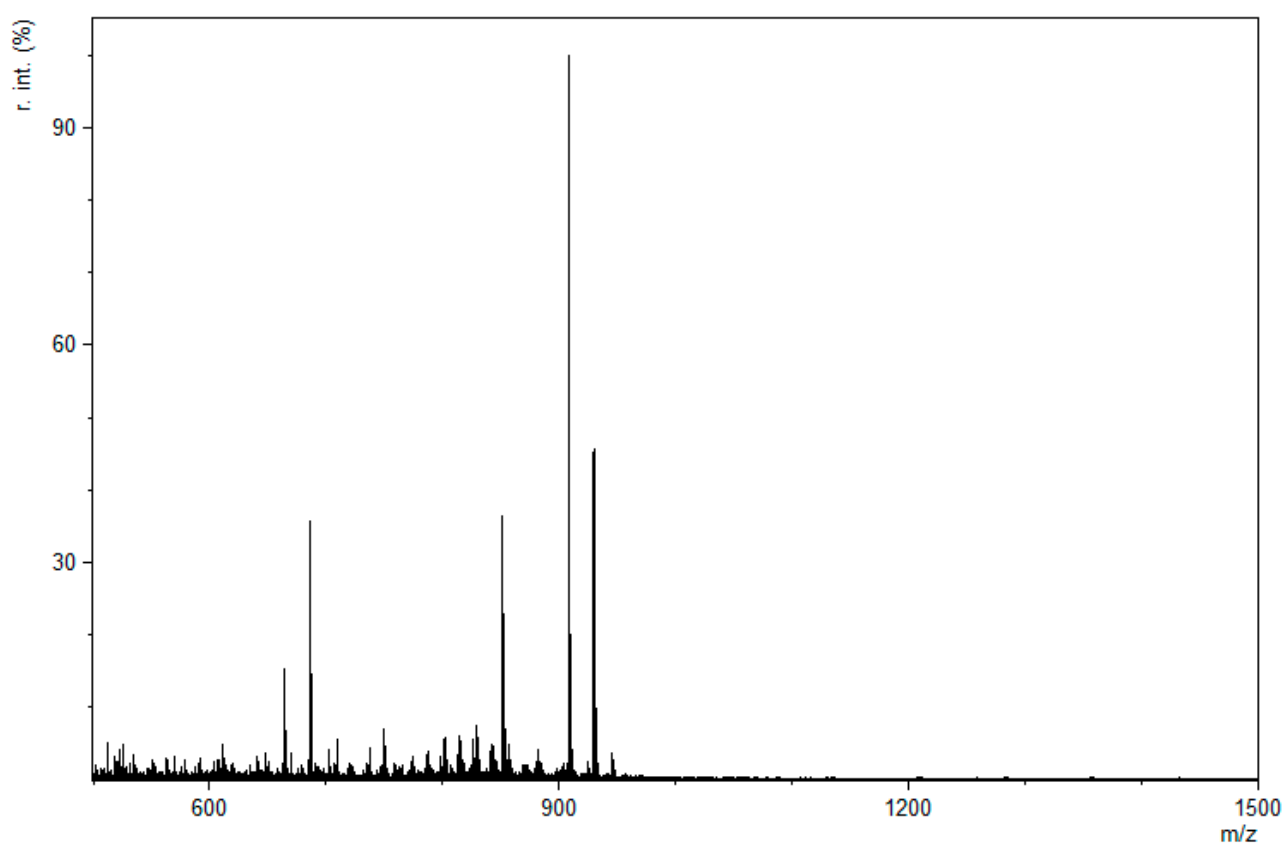

**Figure S12.** HR ESI-MS of compound **4** (MeOH, range: 500-1500 m/z)

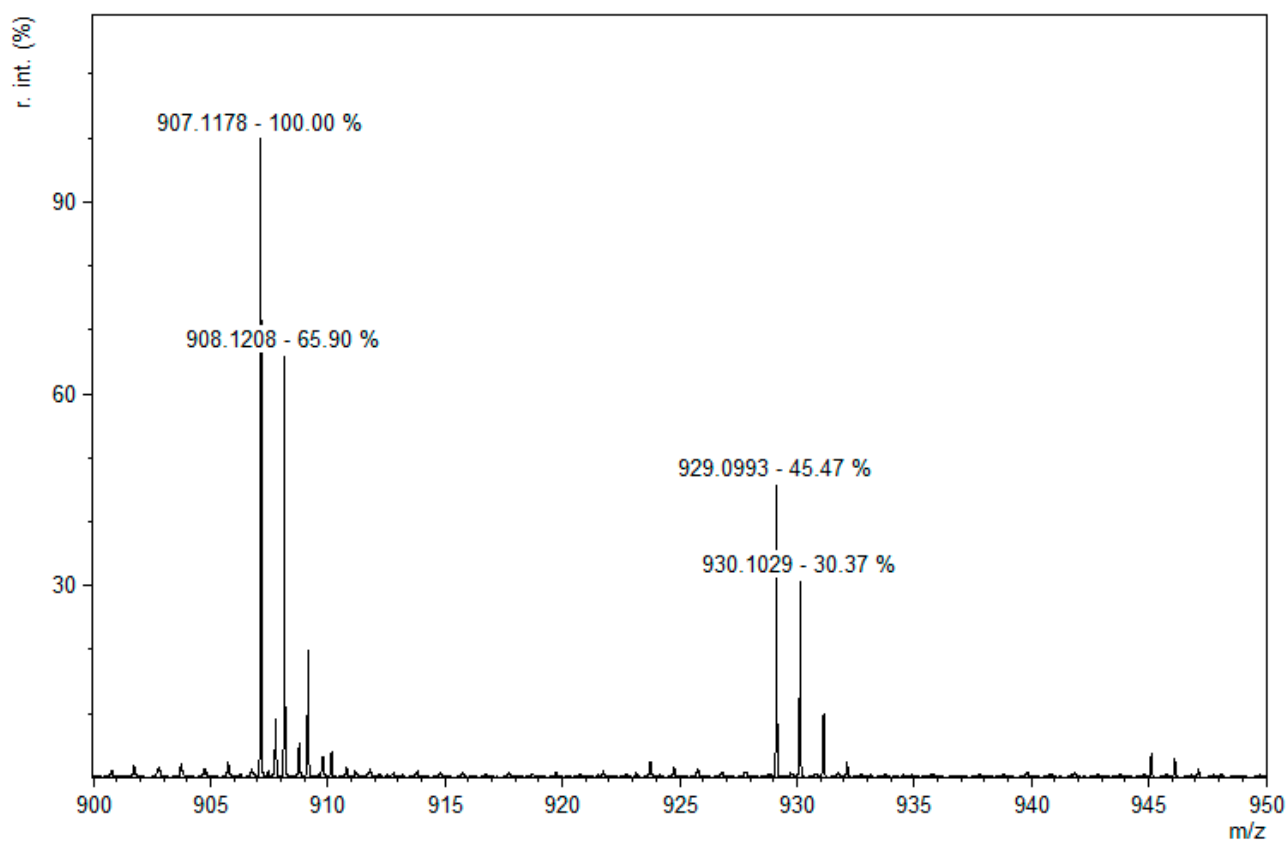

**Figure S13.** HR ESI-MS of compound 4 (MeOH, range: 900-950 m/z)

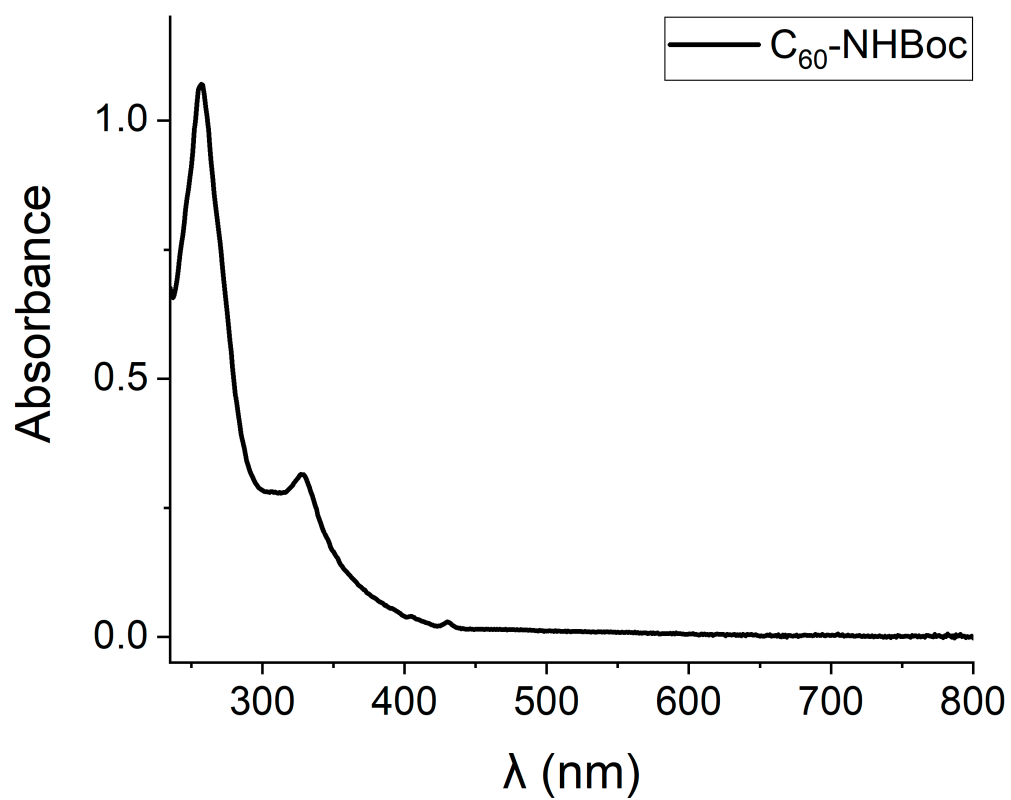

**Figure S14.** UV-Vis spectrum of compound 4 (Dichloromethane, 230-800 nm)



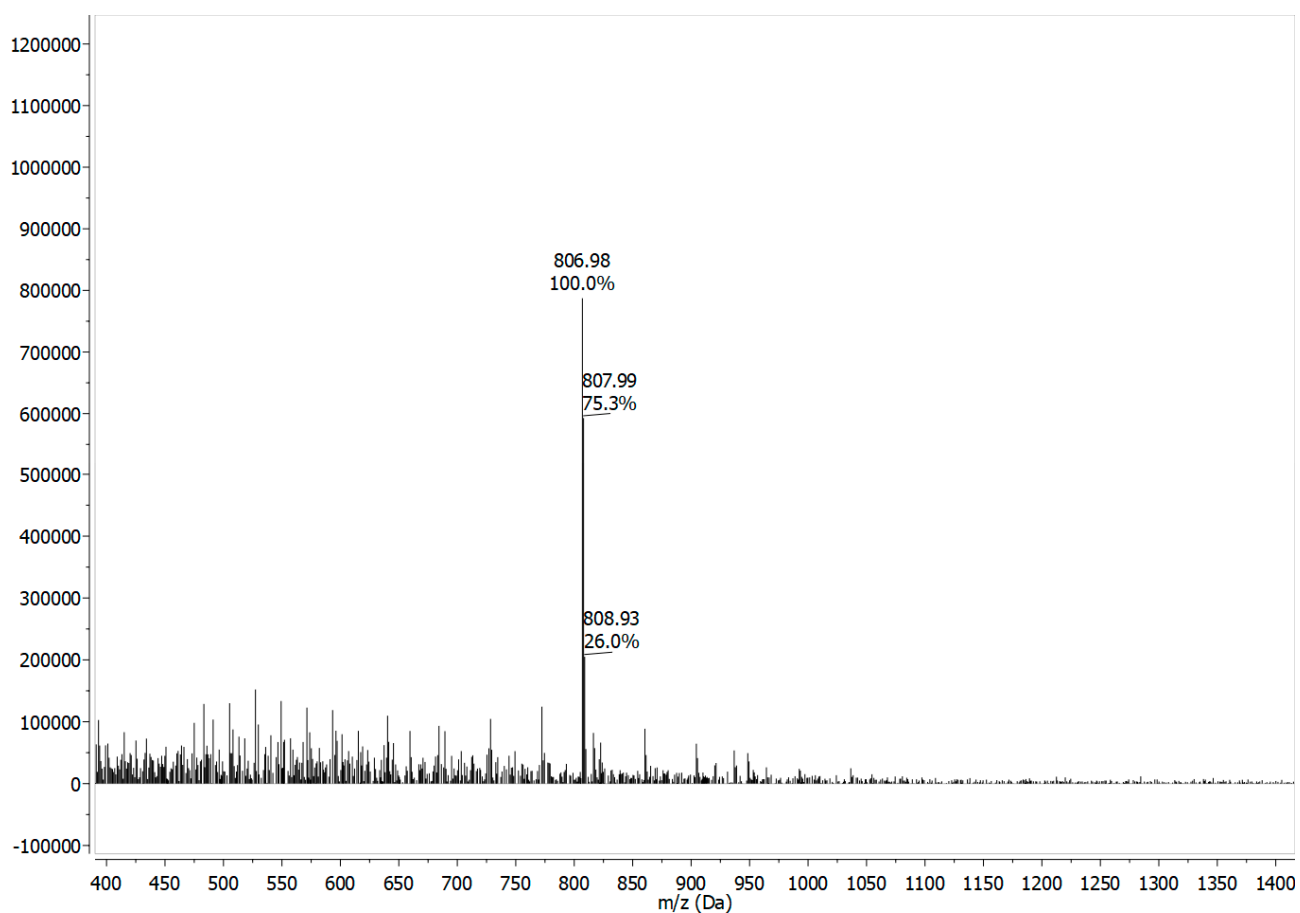

**Figure S15.** ESI-MS of compound **5** (MeOH, range: 400-1400 m/z)

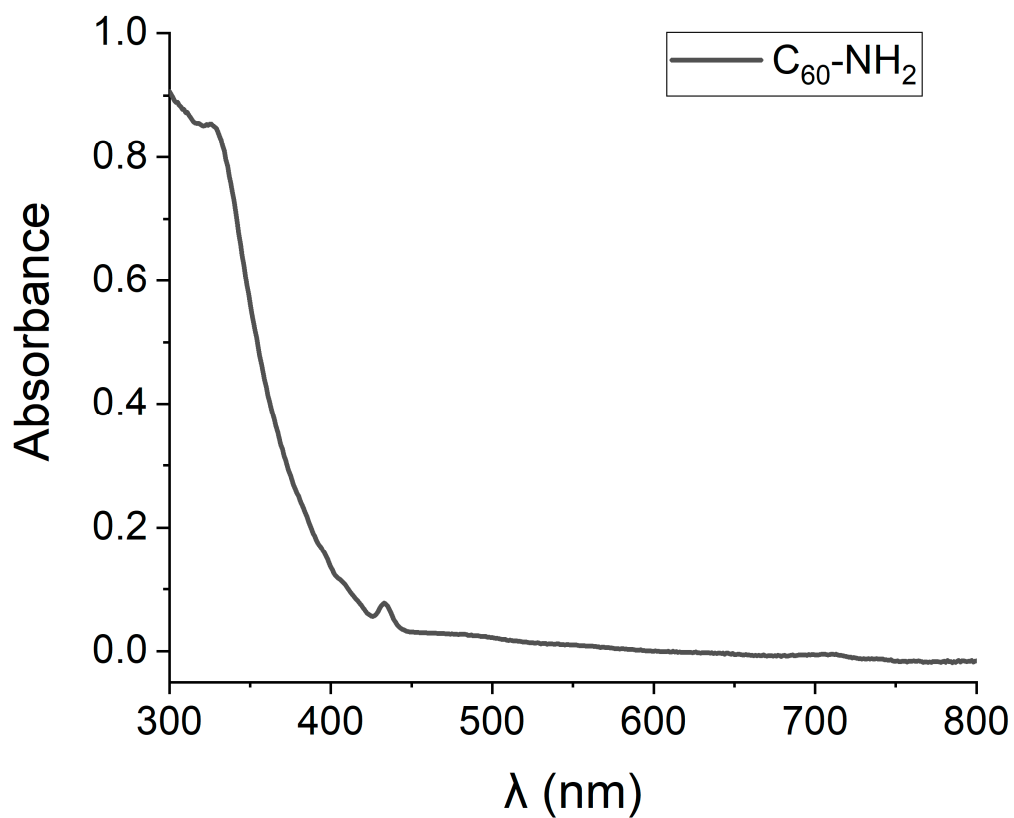

**Figure S16.** UV-Vis spectrum of compound **5** (DMSO, 300-800 nm).
